# Supplementary material
Source: Research Square preprint supplement (doi:10.21203/rs.3.rs-10090179/v1)
Supplement: Supplementary file 1 [file 367deb4ca9954ba38cab7fd5.docx]

**National Forest Inventories**

**Czech Republic (CZ)**

The Czech data correspond to the first (2001-2004) and second (2012-2016) Czech NFI surveys, providing a total of 762 plots and 1104 measurements formed by *P. sylvestris* dominated forests after data preprocessing. The sampling design of the Czech NFI consists of a systematic regular square grid of 2 x 2 km located over the forested areas. Field measurements are conducted using a circular fixed area plot design of 12.61 m radius (500 m2). In each plot, the diameter at breast height () of all trees of ≥ 7 cm is measured, and total tree height () is measured in a sample of trees.

**France (FR)**

Since 2005, the French NFI has adopted the standard of a 1 x 1 km grid-based systematic annual sampling design, so that annual samples homogenously cover the whole territory and form a regular systematic spatial cover after five years. In forest inventory, this spatio-temporal design is known as the “interpenetrating panel design” (1). This strategy has two advantages in terms of representativeness: (i) the systematic nature of each annual sample enables the full diversity of the region's forests to be covered in a single year, (ii) the spatial complementarity of successive annual samples favours the capture of rare cases (rare tree species, very large trees, …). Field measurements are conducted using a circular nested plot design consisting of 3 plots of radius 6, 9 and 15 m, in which trees with ≥ 7.5, 22.5 and 37.5 cm respectively are measured. Measurements include the circumference at breast height for all trees and for a sub-sample, which can then be used in equations to estimate tree volume, biomass and carbon.

**Germany (DE)**

The German NFI provides sample-based data on the status and development of Germany’s forests. Field crews measure trees in permanent plots every ten years, to calculate statistics on forest area, tree species diversity, the age structure of forests, growing stock and timber harvesting. The inventory design is based on systematic grid-based sampling with varying densities of 2 x 2 km, 2.83 x 2 km or 4 x 4 km across individual federal states in Germany. Data are collected in four permanent inventory plots for each grid intersection point (if located in forest areas), separated by a distance of 150 m. At each of the four corner points, nested circular sub-plots of 5 different radii and Bitterlich sub-plots with 2 different basal area factors are established for recording the set of inventory variables involving trees, stand structure and site characteristics (2). Variables such as species, , basal area and vertical stratification (understory, main stand, overstory) are assessed for all trees with a 7 cm by using an angle count sampling factor of 4 (3).

**Italy (IT)**

The Italian NFI design is a three-phase sampling for stratification, in which the first two phases are required to estimate the forest area and its classification into forest categories, while the third is used to collect dendrometric data (4). The third phase consists of approximately 7000 sampling points. The points are randomly selected from the second phase sample and then stratified by administrative region and forest type. The plot design consists of two circular concentric plots of 50 and 530 m2, where trees with larger than 4.5 cm and 9.4 cm respectively are measured.

**Norway (NO)**

The Norwegian NFI was established in 1919. The vast majority of the country has since been inventoried twelve times, and the 13th inventory cycle is now under way. The NFI is a representative sample-based survey of permanent plots, distributed in a grid across the whole country. The plots are assessed on a five-year rotation basis. In plots located on forest land or other land types with tree cover, all trees growing within a 250 m² plot in a grid of 3 x 3 km are measured and their coordinates recorded. The of all trees with ≥ 5 cm is measured with calipers, and is measured in a sample of ten trees selected according to probability proportional to stem basal area.

**Slovakia (SK)**

Data from the 1st and 2nd Slovak NFIs were used, with data collection carried out in the years 2005 and 2015. The basic grid of the Slovak NFI for the whole country has a 4 x 4 km spacing, and the circular inventory plot has a radius of 12.61 m (500 m²). In specific cases (e.g. heterogeneity), the plot is divided into subplots. Concentric plots are used for tree measurements: the first plot, of radius 3 m is used for measuring trees with of 7–12 cm, and the second plots, of radius 12.61 m, is used for measuring trees with > 12 cm. The of all trees in the inventory plots is measured.

**Spain (ES)**

The Spanish data correspond to the third (1997-2007) and fourth (2008-2025) Spanish NFIs, providing a total of 5240 plots formed by *P. sylvestris* dominated forests after data preprocessing. The sampling design consists of a systematic regular square grid of 1 x 1 km located over the forested areas, as registered in the Spanish Forest Map (5). Field measurements are conducted using a circular nested plot design consisting of 4 plots of radius 5, 10, 15 and 25 m, in which trees with 𝑑𝑏ℎ ≥ 7.5, 12.5, 22.5 and 42.5 cm are measured respectively for both and .

**Sweden (SE)**

The Swedish National Forest Inventory is based on stratified systematic sampling of permanent plots complemented by a temporary sample of plots selected using local pivotal sampling in auxiliary help data in each stratum (6,7). The sample plots are grouped into clusters (tracts). The tracts are square or rectangular in shape and are of different dimensions in different parts of the country (depending on strata). The number of sample plots per tract also varies in different parts of the country. Permanent tracts are re-measured every 5th year (1/5th of the permanent and temporary sample is inventoried every year). In this study, we focused on permanent plots. Field plots are measured using a circular nested plot design, for the permanent plots consisting of 2 plots of radius 3.5 and 10 m, in which trees with 𝑑𝑏ℎ ≥ 4 and 10 cm are measured respectively for and (in a sub-sample).

**Switzerland (CH)**

The two most recently completed surveys in the Swiss NFI were NFI3 (2004-2006) and NFI4 (2009-2017). The permanent plots of the Swiss NFI are located on a 1.4 km regular grid across the forested area of Switzerland (Fischer & Traub, 2019). These plots include two concentric circles of 200 m² and 500 m² in which trees of respectively ≥ 12 cm and 36 cm are measured. Measurements include for all trees and for a sub-sample.

**Table 1. References including the allometric models used for predicting AGB.**

| Country | References |
| --- | --- |
| Czech Republic (CZ) | (9–12) |
| France (FR) | (13) |
| Germany (DE) | Provided by the NFI |
| Italy (IT) | Provided by the NFI |
| Latvia (LV) | (14,15) |
| Norway (NO) | Provided by the NFI |
| Slovakia (SK) | (9–12) |
| Spain (ES) | (16–18) |
| Sweden (SE) | Provided by the NFI |
| Switzerland (CH) | Provided by the NFI |

**References**

1. Bontemps JD, Bouriaud O. Take five: about the beat and the bar of annual and 5-year periodic national forest inventories. Ann For Sci. 2024 Dec 31;81(1):53.

2. Kleinn C, Kändler G, Polley H, Riedel T, Schmitz F. The National Forest Inventory in Germany: responding to forest related information needs. Allg E Forst- Jagd Ztg. 2020;191:97–118.

3. Bindewald A, Miocic S, Wedler A, Bauhus J. Forest inventory-based assessments of the invasion risk of Pseudotsuga menziesii (Mirb.) Franco and Quercus rubra L. in Germany. Eur J For Res. 2021 Aug 1;140(4):883–99.

4. Tabacchi G, Natale FD, Floris A, Gagliano C, Gasparini P, Scrinzi G, et al. Italian National Forest Inventory: methods, state of the project, and future developments. McRoberts Ronald E Reams Gregory Van Deusen Paul C McWilliams William H Eds Proc Seventh Annu For Inventory Anal Symp Oct 3-6 2005 Portland ME Gen Tech Rep WO-77 Wash DC US Dep Agric For Serv 55-66 [Internet]. 2007 [cited 2025 Oct 6];77. Available from: https://research.fs.usda.gov/treesearch/14906

5. Ministerio para la Transición Ecológica y el Reto Demográfico. Mapa Forestal de España (MFE50) [Internet]. Madrid, Spain: Ministerio para la Transición Ecológica y el Reto Demográfico; 2025 [cited 2025 Oct 6]. Available from: https://www.miteco.gob.es/es/biodiversidad/servicios/banco-datos-naturaleza/informacion-disponible/mfe50.html

6. Fridman J, Holm S, Nilsson M, Nilsson P, Ringvall AH, Ståhl G. Adapting National Forest Inventories to changing requirements – the case of the Swedish National Forest Inventory at the turn of the 20th century. Silva Fenn [Internet]. 2014 July 2 [cited 2025 Oct 6];48(3). Available from: https://www.silvafennica.fi/article/1095/keyword/sampling

7. Grafström A, Zhao X, Nylander M, Petersson H. A new sampling strategy for forest inventories applied to the temporary clusters of the Swedish national forest inventory. Can J For Res. 2017 Sept;47(9):1161–7.

8. Fischer C, Traub B, editors. Swiss National Forest Inventory – Methods and Models of the Fourth Assessment [Internet]. Cham: Springer International Publishing; 2019 [cited 2025 Oct 6]. (Managing Forest Ecosystems; vol. 35). Available from: http://link.springer.com/10.1007/978-3-030-19293-8

9. Cienciala E, Černý M, Tatarinov F, Apltauer J, Exnerová Z. Biomass functions applicable to Scots pine. Trees. 2006 June 1;20(4):483–95.

10. Čihák T, Vejpustková M. Parameterisation of allometric equations for quantifying aboveground biomass of Norway spruce (Picea abies (L.) H. Karst.) in the Czech Republic. 2018 [cited 2025 Oct 7]; Available from: http://jfs.agriculturejournals.cz/pdfs/jfs/2018/03/02.pdf

11. Novák J, Slodičák M, Dušek D. Aboveground biomass of substitute tree species stand with respect to thinning-European larch (Larix decidua Mill.). 2011 [cited 2025 Oct 7]; Available from: https://www.agriculturejournals.cz/pdfs/jfs/2011/01/02.pdf

12. Vejpustková M, Zahradník D, Čihák T, Šrámek V. Models for predicting aboveground biomass of European beech (Fagus sylvatica L.) in the Czech Republic. 2015 [cited 2025 Oct 7]; Available from: https://www.vulhm.cz/files/uploads/2019/03/100-2014-Vejpustkova.pdf

13. Vallet P, Dhôte JF, Moguédec GL, Ravart M, Pignard G. Development of total aboveground volume equations for seven important forest tree species in France. For Ecol Manag. 2006 July 1;229(1):98–110.

14. Liepiņš J, Lazdiņš A, Liepiņš K. Equations for estimating above- and belowground biomass of Norway spruce, Scots pine, birch spp. and European aspen in Latvia. Scand J For Res. 2018 Jan 2;33(1):58–70.

15. Liepiņš J, Liepiņš K, Lazdiņš A. Equations for estimating the above- and belowground biomass of grey alder (Alnus incana (L.) Moench.) and common alder (Alnus glutinosa L.) in Latvia. Scand J For Res. 2021 July 4;36(5):389–400.

16. Montero G, Ruiz-Peinado R, Muñoz M. Producción de biomasa y fijación de CO2 por los bosques españoles. 2011;1–270.

17. Ruiz-Peinado R, Rio M del, Montero G. New models for estimating the carbon sink capacity of Spanish softwood species. For Syst. 2011 Apr 13;20(1):176–88.

18. Ruiz-Peinado R, Montero G, Río M del. Biomass models to estimate carbon stocks for hardwood tree species. Inst Cienc For ICIFOR [Internet]. 2012 [cited 2025 Oct 7]; Available from: https://digital.csic.es/handle/10261/289595
