# Supplementary material
Source: Research Square preprint supplement (doi:10.21203/rs.3.rs-10090179/v1)
Supplement: Supplementary file 2 [file d3d50b8856e542fe0e1799f4.docx]

**Supplementary material**


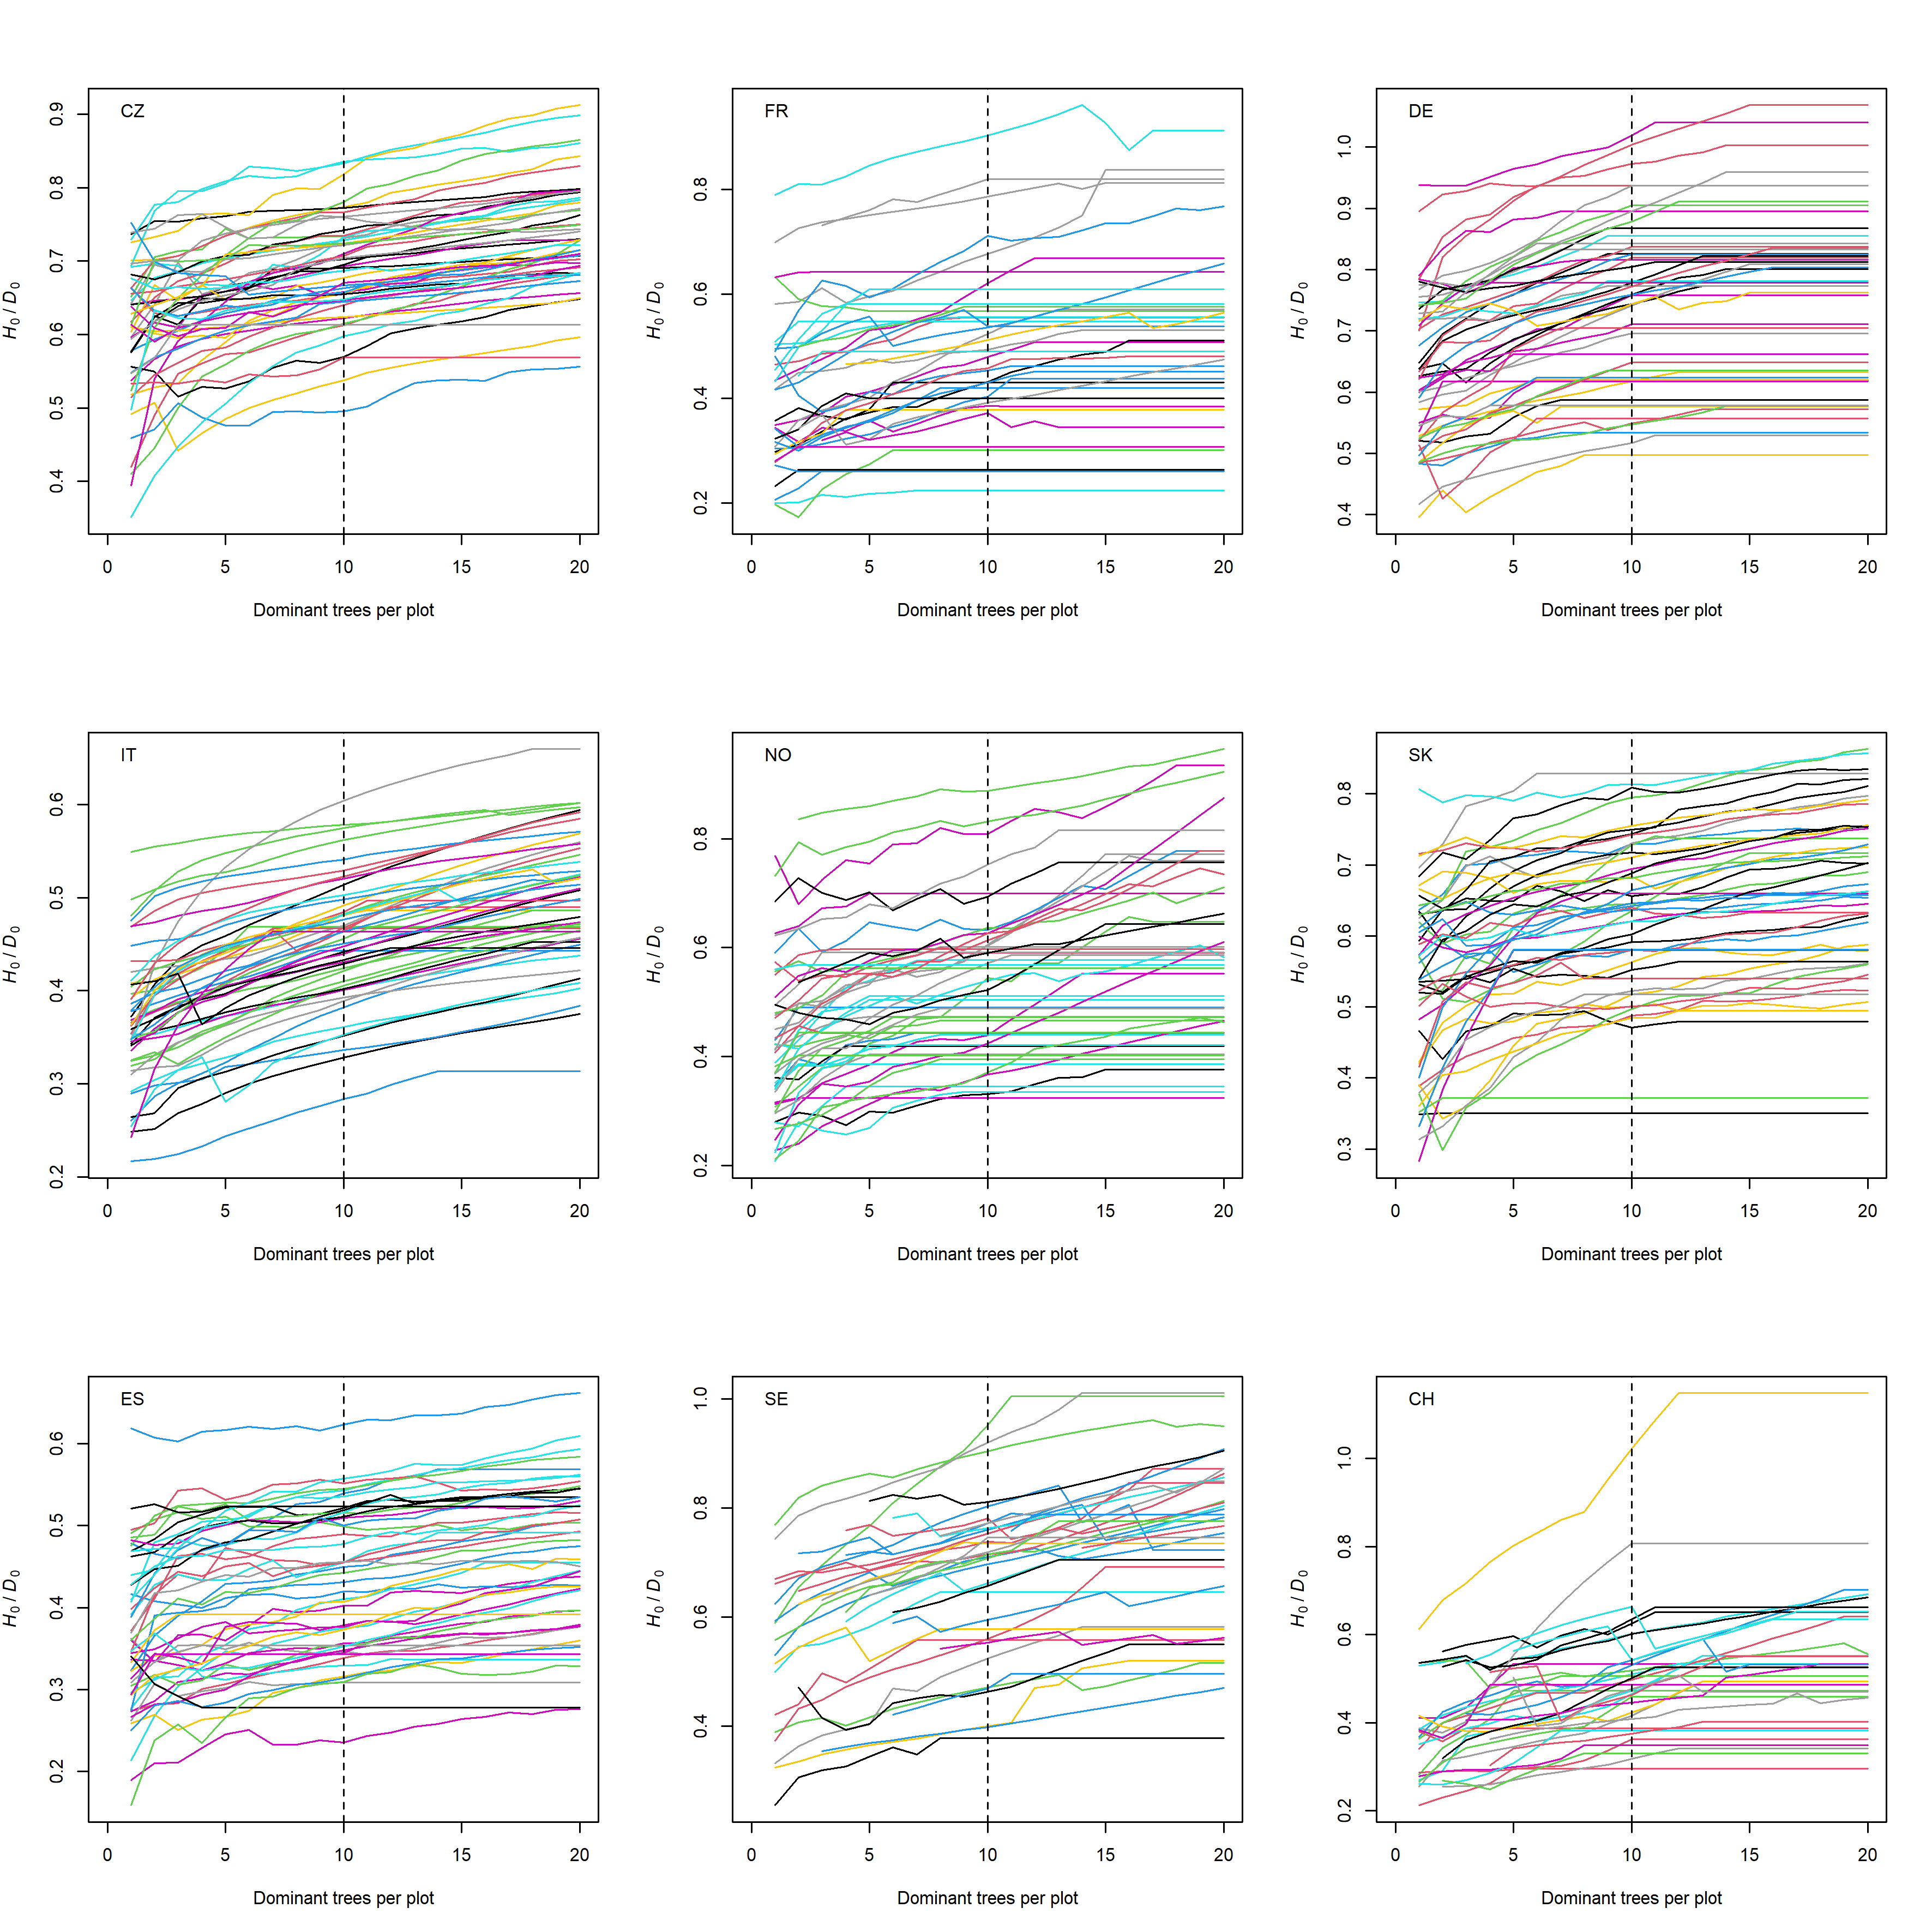


Fig. 1. / ratio from 1 to 20 dominant trees per plot. Each line represents a random plot from NFI.


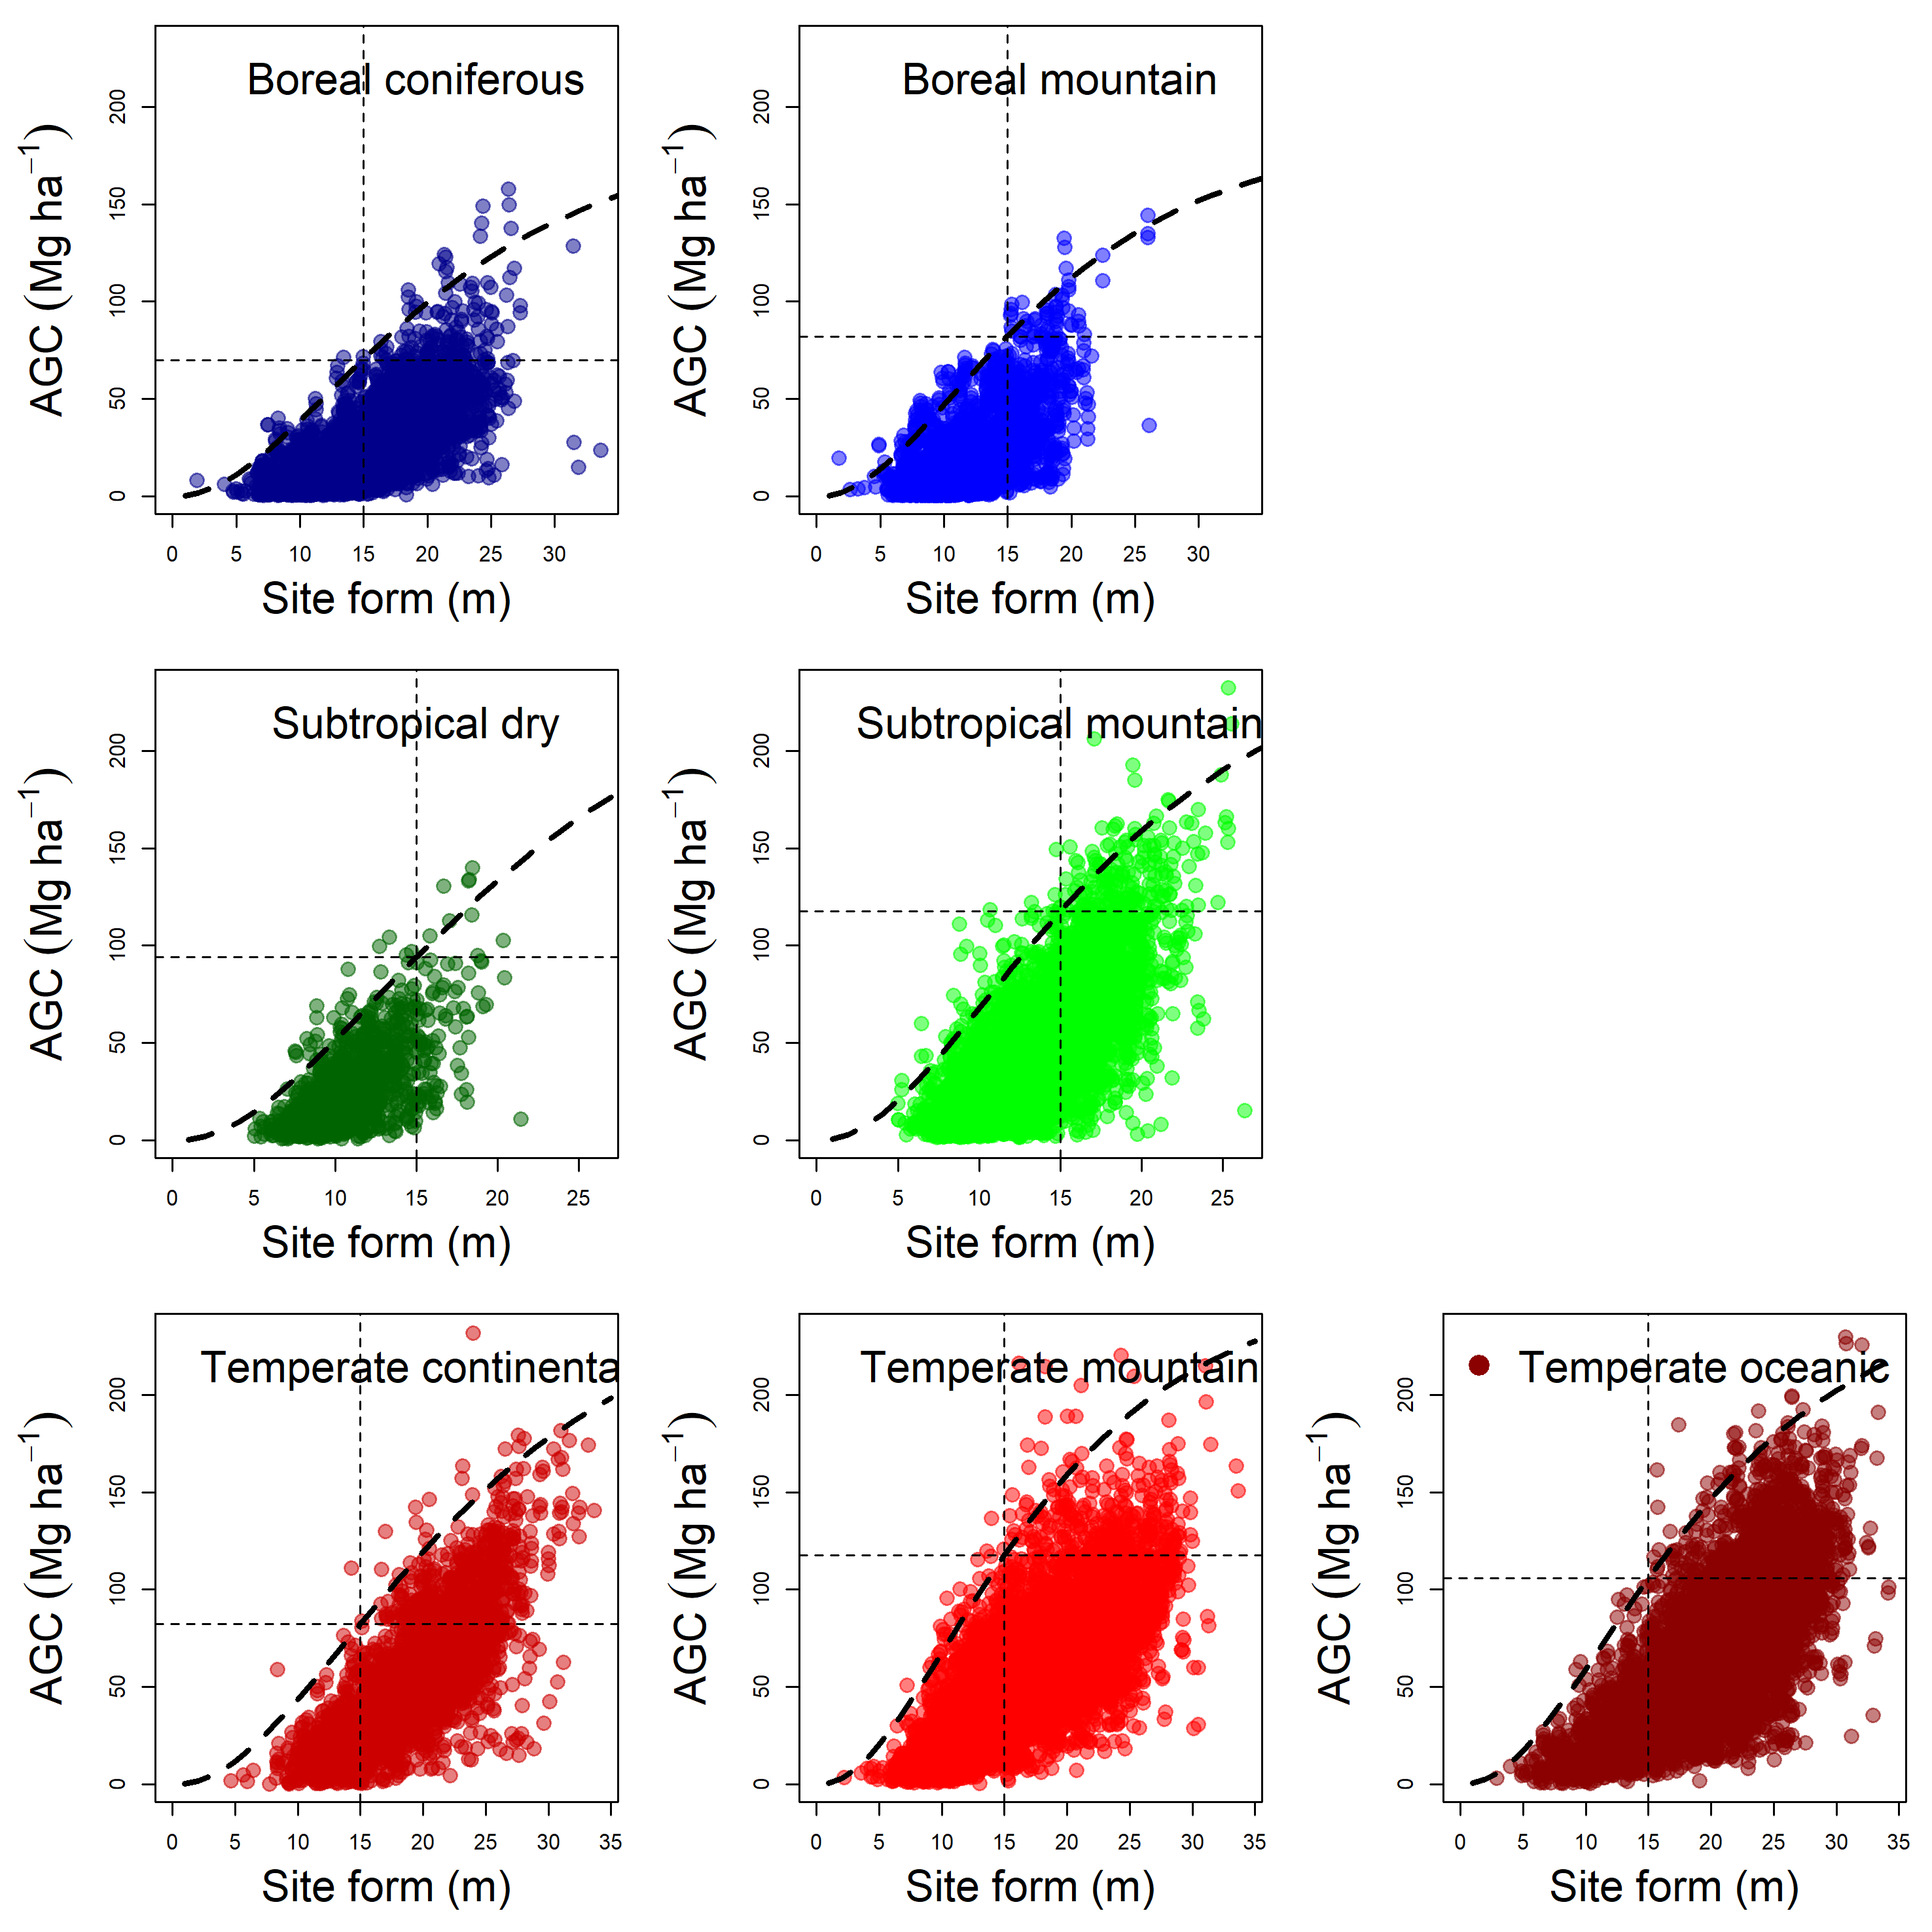


Fig. 2. selection as the maximum AGC values for SF = 15 m (fine dashed lines), based on predicted carbon carrying capacity (PCSC) curves (bold dashed line) overlaid on the observed data for the Global Ecological Zones (GEZ) boreal mountain systems and coniferous forests (top); subtropical dry forest and mountain systems (middle); and temperate continental forest, mountain system and oceanic forests (down).


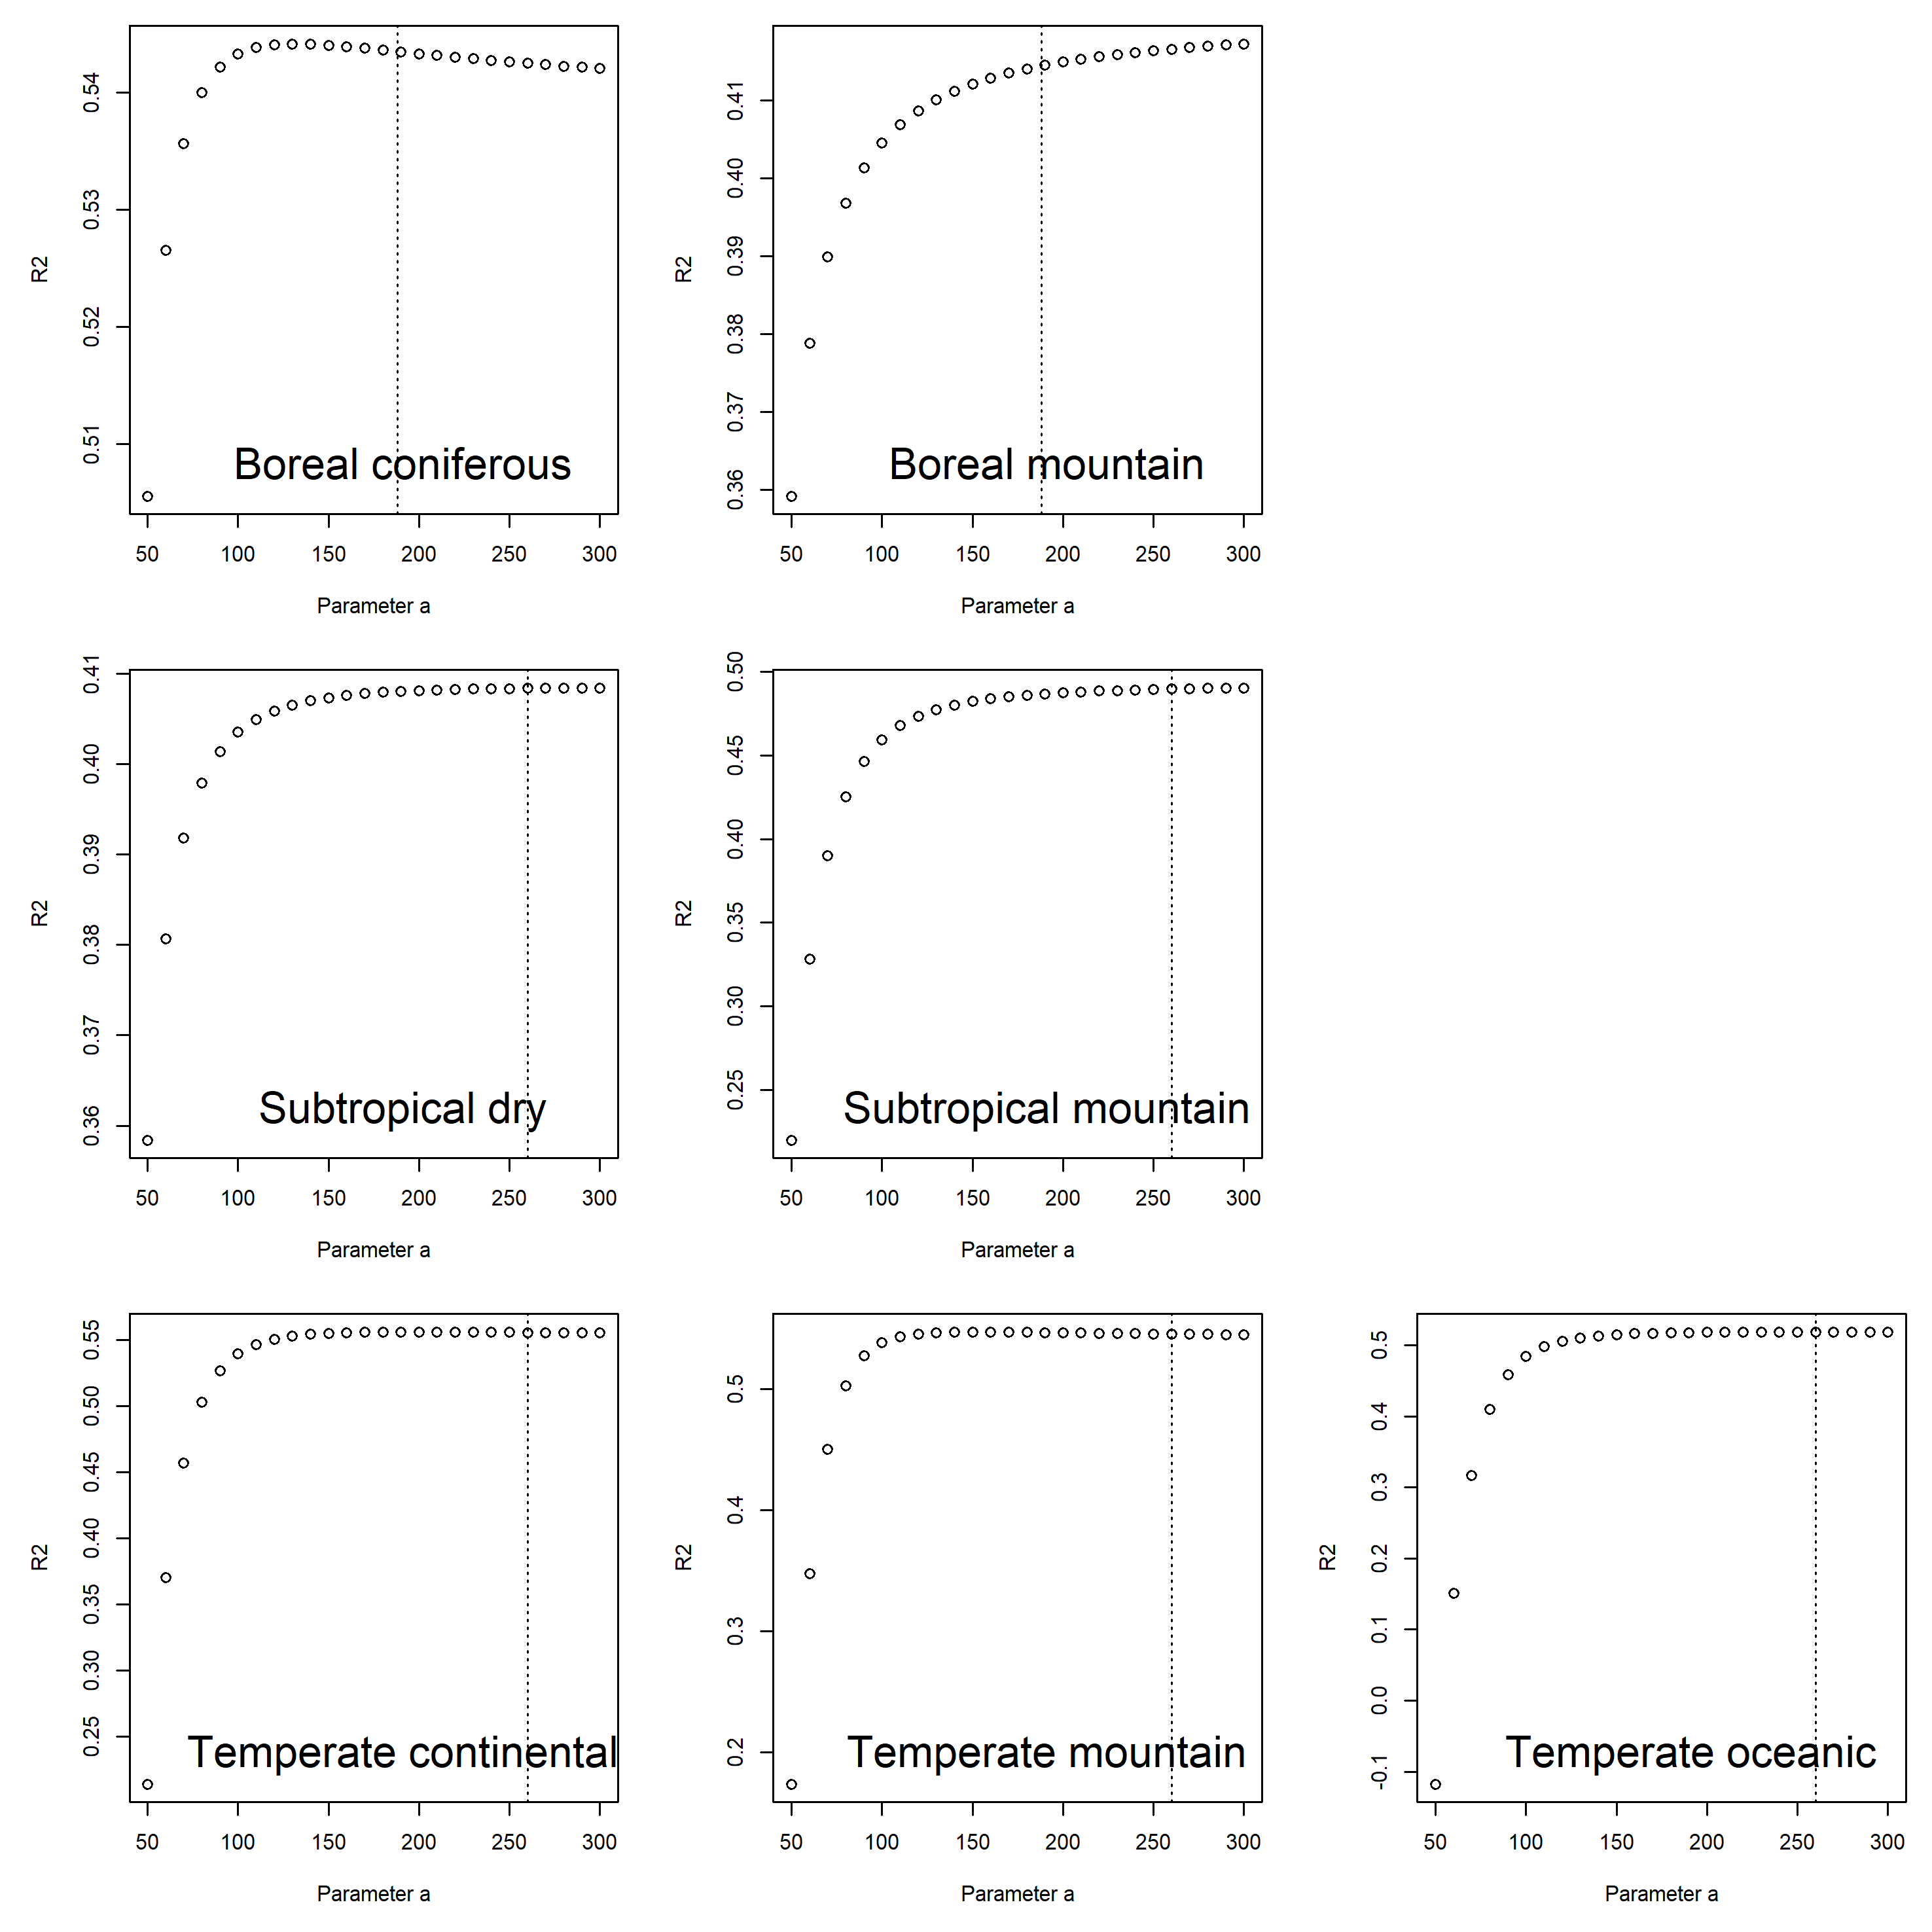


Fig. 3. Selection of the asymptote parameter () based on values. Dots represent values after fitting the PCSC models (Eq. 7) using the different values of the parameter (50-300 Mg ha-1).


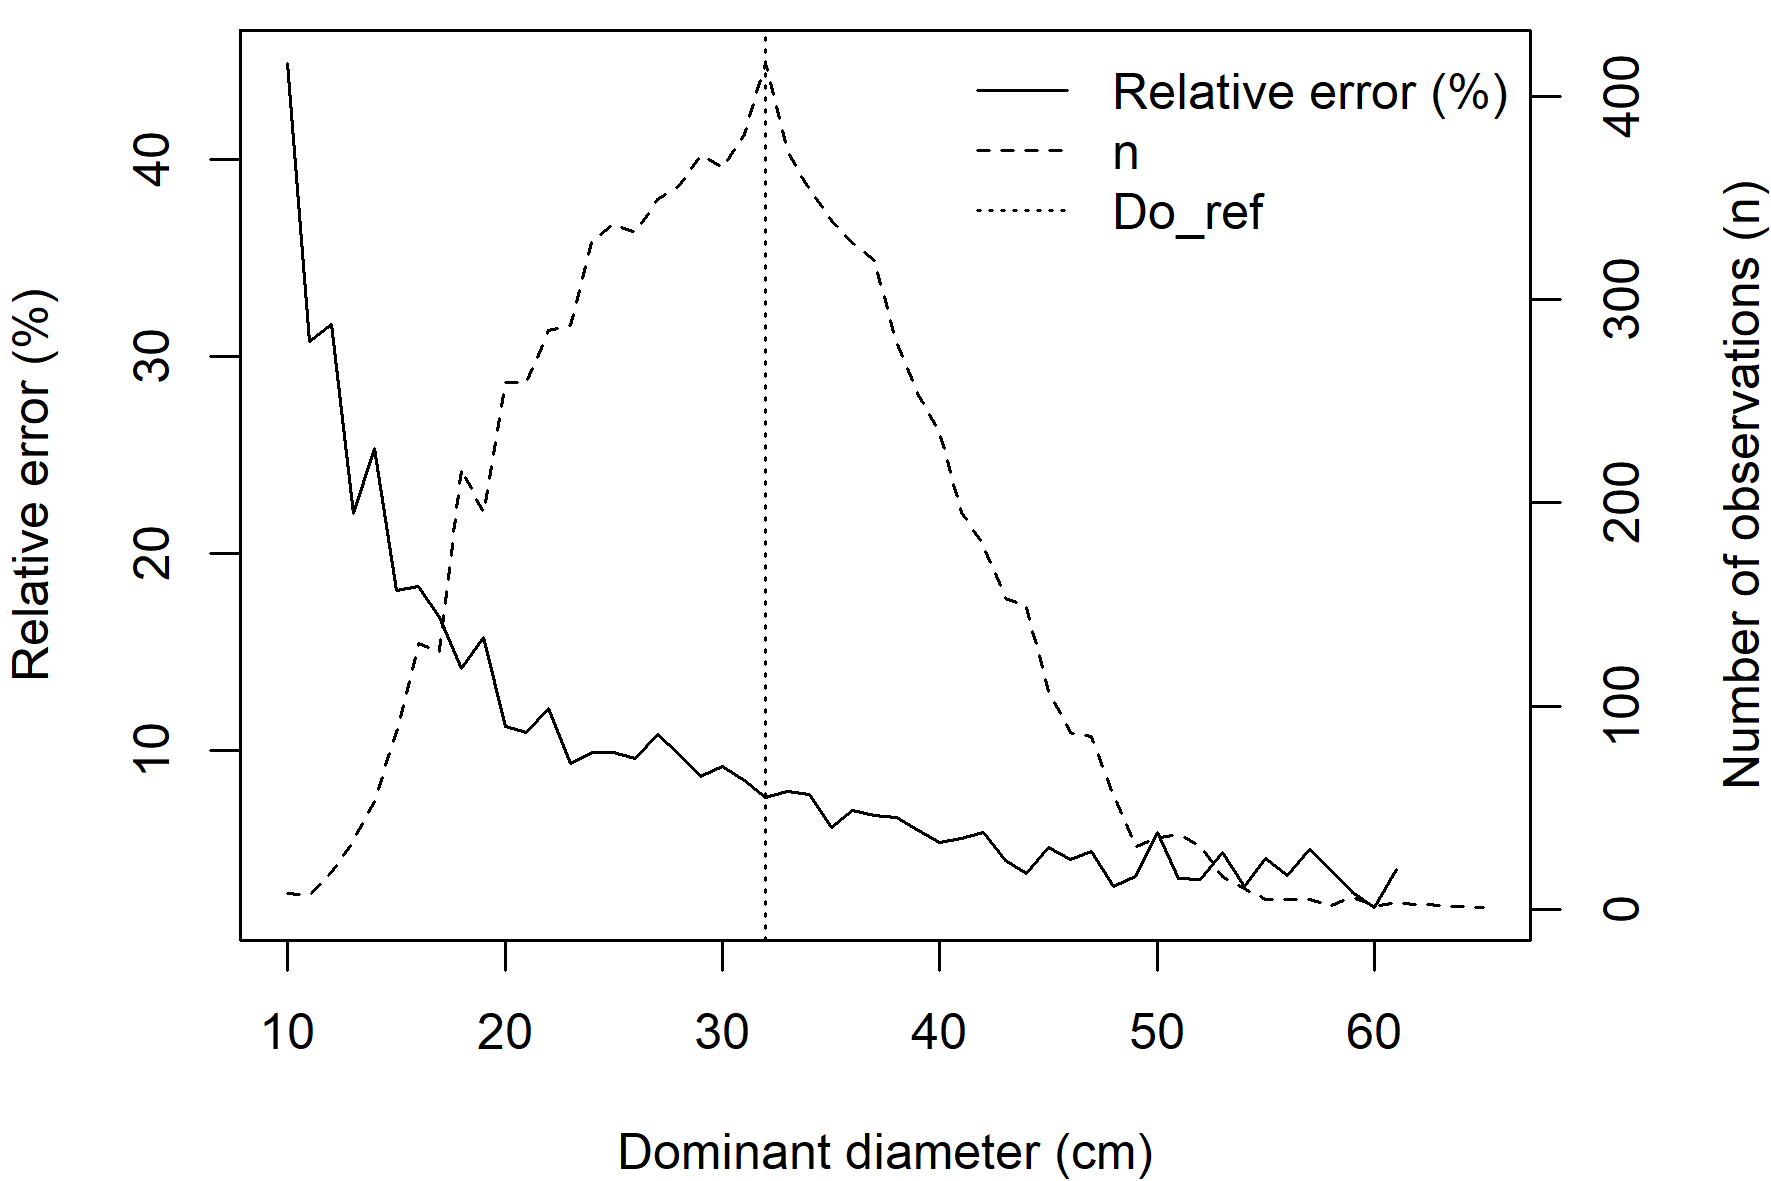


Fig. 4. Relative error (RE%) in prediction related to choice of .


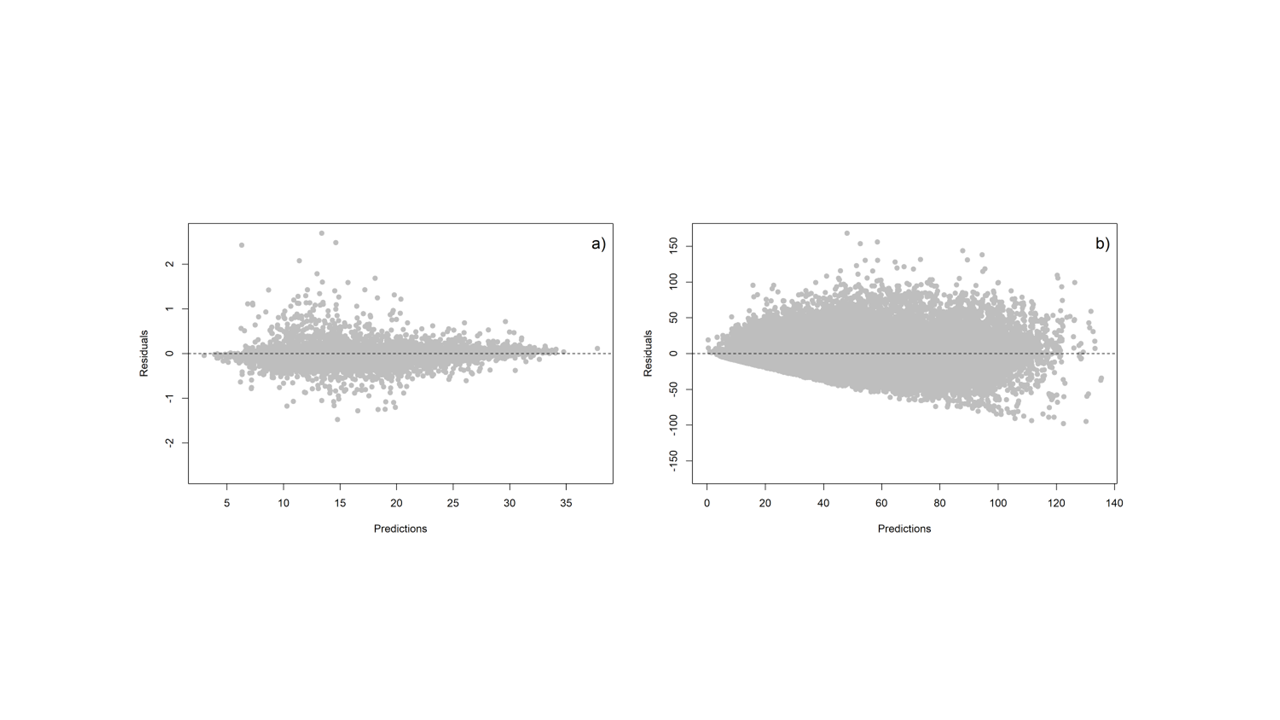


Fig. 5. SF (a) and PCSC (b) model residuals plotted against predicted values.


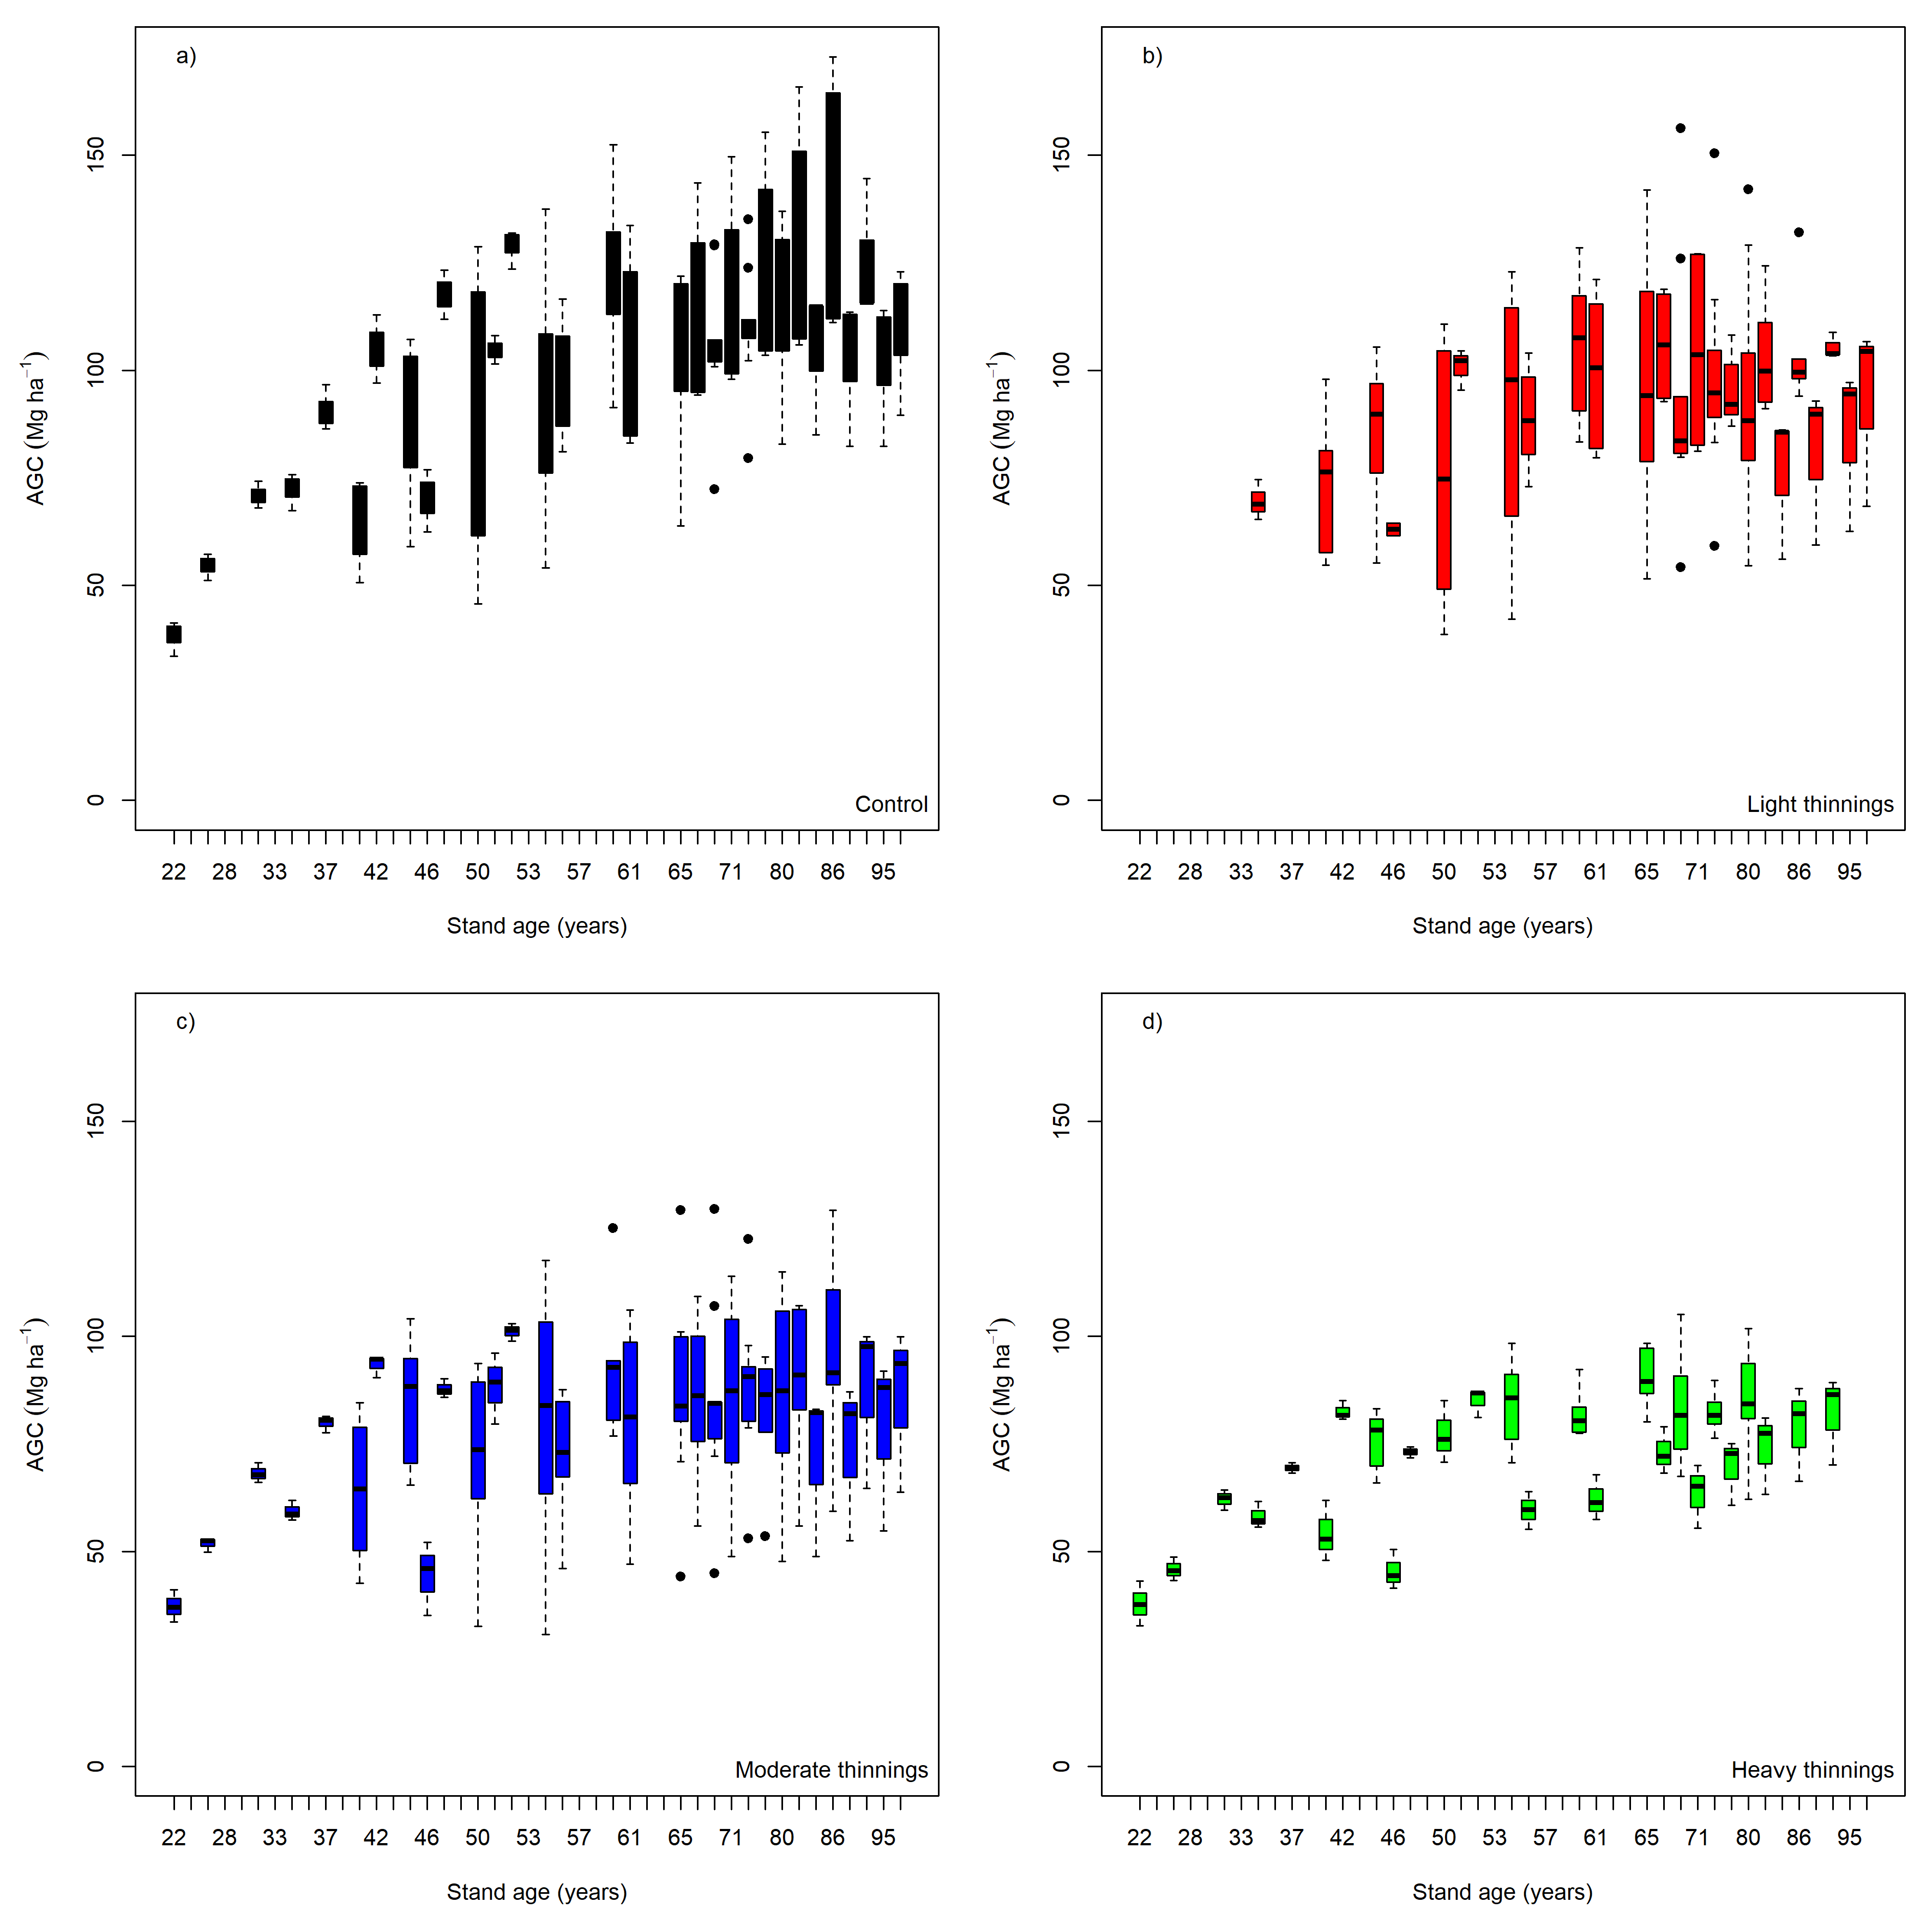


Fig. 6. Changes in carbon stocks over time in control (a), light (b), moderate (c) and heavy (d) thinning trials.
